# Supplementary material for: Chromatographic analysis of bromhexine and oxytetracycline residues in milk as a drug analysis medium with greenness profile appraisal
Source: Royal Society of Chemistry journal article supplement (doi:10.1039/d2ay01462a), 2022-01-01
Supplement: d2ay01462a1.pdf [file d2ay01462a1.pdf]

Supplementary Table 1. Stability results of the studied drugs in spiked milk at different conditions for TLC-densitometric method.

| <b>Oxytetracycline</b>                                                   |                                                                         |                                                                    |
|--------------------------------------------------------------------------|-------------------------------------------------------------------------|--------------------------------------------------------------------|
| <b>Concentration of the analyte<br/>(<math>\mu\text{g}</math> /band)</b> | <b>Three freeze thaw cycles<br/>(%Recovery <math>\pm</math> %RSD) *</b> | <b>Bench top stability<br/>(%Recovery <math>\pm</math> %RSD)*</b>  |
| 0.50                                                                     | 96.70 $\pm$ 0.82                                                        | 96.48 $\pm$ 2.52                                                   |
| 6.00                                                                     | 100.97 $\pm$ 1.06                                                       | 101.25 $\pm$ 0.57                                                  |
| 9.00                                                                     | 99.37 $\pm$ 1.40                                                        | 100.18 $\pm$ 0.18                                                  |
| <b>Mean <math>\pm</math> RSD</b>                                         | <b>99.01<math>\pm</math>1.09</b>                                        | <b>99.30<math>\pm</math>1.093</b>                                  |
| <b>Bromhexine</b>                                                        |                                                                         |                                                                    |
| <b>Concentration of the analyte<br/>(<math>\mu\text{g}</math> /band)</b> | <b>Three freeze thaw cycles<br/>(%Recovery <math>\pm</math> %RSD) *</b> | <b>Bench top stability<br/>(%Recovery <math>\pm</math> %RSD) *</b> |
| 0.10                                                                     | 98.28 $\pm$ 2.82                                                        | 94.41 $\pm$ 2.55                                                   |
| 1.20                                                                     | 101.20 $\pm$ 1.86                                                       | 98.15 $\pm$ 3.01                                                   |
| 1.80                                                                     | 96.16 $\pm$ 1.37                                                        | 98.10 $\pm$ 2.89                                                   |
| <b>Mean <math>\pm</math> RSD</b>                                         | <b>98.55<math>\pm</math>2.22</b>                                        | <b>96.89<math>\pm</math>2.82</b>                                   |

\*Average of 5 determinations

Supplementary Table 2. Stability results of the studied drugs in spiked milk at different conditions for RP-HPLC method.

| <b>Oxytetracycline</b>                                                |                                                                         |                                                                    |
|-----------------------------------------------------------------------|-------------------------------------------------------------------------|--------------------------------------------------------------------|
| <b>Concentration of the analyte<br/>(<math>\mu\text{g}</math>/mL)</b> | <b>Three freeze thaw cycles<br/>(%Recovery <math>\pm</math> %RSD) *</b> | <b>Bench top stability<br/>(%Recovery <math>\pm</math> %RSD) *</b> |
| 0.10                                                                  | 99.94 $\pm$ 2.30                                                        | 99.64 $\pm$ 0.92                                                   |
| 10.00                                                                 | 101.93 $\pm$ 1.49                                                       | 100.82 $\pm$ 0.44                                                  |
| 30.00                                                                 | 97.52 $\pm$ 3.12                                                        | 98.56 $\pm$ 0.84                                                   |
| <b>Mean<math>\pm</math>RSD</b>                                        | <b>99.80<math>\pm</math>2.30</b>                                        | <b>99.67<math>\pm</math>0.73</b>                                   |
| <b>Bromhexine</b>                                                     |                                                                         |                                                                    |
| <b>Concentration of the analyte<br/>(<math>\mu\text{g}</math>/mL)</b> | <b>Three freeze thaw cycles<br/>(%Recovery <math>\pm</math> %RSD) *</b> | <b>Bench top stability<br/>(%Recovery <math>\pm</math> %RSD) *</b> |
| 0.20                                                                  | 98.78 $\pm$ 1.96                                                        | 100.16 $\pm$ 2.28                                                  |
| 10.00                                                                 | 102.60 $\pm$ 1.12                                                       | 102.32 $\pm$ 1.21                                                  |
| 20.00                                                                 | 101.52 $\pm$ 1.95                                                       | 101.66 $\pm$ 1.44                                                  |
| <b>Mean<math>\pm</math>RSD</b>                                        | <b>100.97<math>\pm</math>1.68</b>                                       | <b>101.38<math>\pm</math>1.64</b>                                  |

\*Average of 5 determinations

Supplementary Table 3. NEMI metric system for the assessment of TLC-densitometric method , RP-HPLC method and the reported method.

|                    | PBT reagents             | Non PBT reagents               | Hazardous reagents (RCRA included solvents) | Nonhazardous (RCRA non included solvents) | corrosive | waste                           | Pictogram |
|--------------------|--------------------------|--------------------------------|---------------------------------------------|-------------------------------------------|-----------|---------------------------------|-----------|
| TLC                | Methanol-Dichloromethane | Acetic acid-EDTA               | Methanol-Acetic acid                        | EDTA-Dichloromethane                      | 2<pH < 12 | Generated waste =6.05 ml < 50mL |           |
| HPLC               | -----                    | Ethanol-Acetic acid-water-EDTA | Acetic acid                                 | Ethanol-water                             | 2<pH < 12 | Generated waste =13.7ml < 50mL  |           |
| Reported HPLC [34] | Methanol acetonitrile    | Trifluoroacetic acid           | Trifluoroacetic acid acetonitrile           | water                                     | 2<PH < 12 | Generated waste =22ml < 50ml    |           |

Supplementary Table 4. Modified NEMI metric system for the assessment of TLC-densitometric , RP-HPLC and the reported method.

| Category                                                                                                      | TLC   |                                                                |     | HPLC  |                                      |     | Reported HPLC [34] |                                                         |     |
|---------------------------------------------------------------------------------------------------------------|-------|----------------------------------------------------------------|-----|-------|--------------------------------------|-----|--------------------|---------------------------------------------------------|-----|
|                                                                                                               | Green | Yellow                                                         | Red | Green | Yellow                               | Red | Green              | Yellow                                                  | Red |
| Health Hazard<br>According to NFPA health hazards score<br>:<br>-Green :0-1<br>-Yellow:2-3<br>-Red: 4-5       |       | Acetic acid=3<br>Methylene chloride=2<br>Methanol=2<br>EDTA= 1 |     |       | Acetic acid=3<br>Ethanol=2<br>EDTA=1 |     |                    | trifluoroacetic acid=1<br>Acetonitrile=2<br>Methanol=2  |     |
| Safety hazard<br>According to NFPA flammability hazards score<br>:<br>-Green :0-1<br>-Yellow:2-3<br>-Red: 4-5 |       | Acetic acid=2<br>Methylene chloride=1<br>Methanol=3<br>EDTA= 0 |     |       | Acetic acid=2<br>Ethanol=3<br>EDTA=0 |     |                    | trifluoroacetic acid=0<br>Acetonitrile=3<br>Methanol= 3 |     |

|                                                                                                                                                                                                                |                                      |  |  |                                      |                               |  |                                      |                               |  |
|----------------------------------------------------------------------------------------------------------------------------------------------------------------------------------------------------------------|--------------------------------------|--|--|--------------------------------------|-------------------------------|--|--------------------------------------|-------------------------------|--|
|                                                                                                                                                                                                                |                                      |  |  |                                      |                               |  |                                      |                               |  |
| <b>Environmental hazard</b><br>-Green: If the Environmental hazard is less than 50 g.<br>-Yellow: If the Environmental hazard is ranged from 50-250g<br>-Red: If the Environmental hazard is higher than 250g. | Environmental hazard is less than 50 |  |  | Environmental hazard is less than 50 |                               |  | Environmental hazard is less than 50 |                               |  |
| Energy                                                                                                                                                                                                         | Instrumental method TLC              |  |  |                                      | Instrumental method HPLC <1.5 |  |                                      | Instrumental method HPLC <1.5 |  |
| <b>Waste amount</b><br>The total waste was less than 50 g or mL for one sample analysis.                                                                                                                       | Less than 50 g                       |  |  | Less than 50 g                       |                               |  | Less than 50 g                       |                               |  |
| <b>Pictograms</b>                                                                                                                                                                                              |                                      |  |  |                                      |                               |  |                                      |                               |  |

Supplementary Table 5. GAPI metric system for the assessment of TLC-densitometric , RP-HPLC and the HPLC reported methods.

| Sample Preparation          |                       |               |                                                                        |                         |                     |                                                                                       |                              |                       |
|-----------------------------|-----------------------|---------------|------------------------------------------------------------------------|-------------------------|---------------------|---------------------------------------------------------------------------------------|------------------------------|-----------------------|
|                             | Collecti on           | preservat ion | transport                                                              | storage                 | Type of method      | Scale of extraction                                                                   | Solvents/reagents used       | Additional treatments |
| <b>TLC</b>                  | Off-line              | None          | None                                                                   | Under normal conditions | Extraction required | Macro-extraction                                                                      | Green solvents/ reagents     | None                  |
| <b>HPLC</b>                 | Off-line              | None          | None                                                                   | Under normal conditions | Extraction required | Macro-extraction                                                                      | Green solvents/ reagents     | None                  |
| <b>Reported method [34]</b> | Off-line              | None          | None                                                                   | Under normal conditions | Simple procedures   | -                                                                                     | Non-green solvents/ reagents | None                  |
| Reagents and Solvents       |                       |               |                                                                        |                         |                     |                                                                                       |                              |                       |
|                             | Amount                |               | Health Hazards                                                         |                         |                     | Safety Hazards                                                                        |                              |                       |
| <b>TLC</b>                  | < 10 mL (< 10 g)      |               | Moderately toxic; could cause temporary incapacitation; NFPA = 2 or 3. |                         |                     | Highest NFPA flammability or instability score = 2 or 3, or a special hazard is used. |                              |                       |
| <b>HPLC</b>                 | 10-100 mL (10-100 g)  |               | Moderately toxic; could cause temporary incapacitation; NFPA = 2 or 3. |                         |                     | Highest NFPA flammability or instability score = 2 or 3, or a special hazard is used. |                              |                       |
| <b>Reported method [34]</b> | 10-100 mL (10-100 g)  |               | Moderately toxic; could cause temporary incapacitation; NFPA = 2 or 3. |                         |                     | Highest NFPA flammability or instability score = 2 or 3, or a special hazard is used. |                              |                       |
| Instrumentation             |                       |               |                                                                        |                         |                     |                                                                                       |                              |                       |
|                             | Energy                |               | Occupational Hazards                                                   | Waste                   |                     | Waste Treatment                                                                       |                              |                       |
| <b>TLC</b>                  | <= 0.1 kWh per sample |               | Hermetic sealing of the analytical process                             | < 10 mL (>10 g)         |                     | No treatment                                                                          |                              |                       |
| <b>HPLC</b>                 | <= 1.5 kWh per sample |               | Hermetic sealing of the analytical process                             | > 10 mL (>10 g)         |                     | No treatment                                                                          |                              |                       |
| <b>Reported method [34]</b> | <= 1.5 kWh per sample |               | Hermetic sealing of the analytical process                             | > 10 mL (>10 g)         |                     | No treatment                                                                          |                              |                       |
| Pictograms                  |                       |               |                                                                        |                         |                     |                                                                                       |                              |                       |
| <b>TLC</b>                  |                       |               |                                                                        |                         |                     |                                                                                       |                              |                       |

|                             |  |
|-----------------------------|--|
| <b>HPLC</b>                 |  |
| <b>Reported method [34]</b> |  |

Supplementary Table 6. AGREE metric system for the assessment of TLC , TLC-densitometric , RP-HPLC and the HPLC reported methods.

| Parameters                                                                                                                                                                            | TLC                                        | RP-HPLC                                    | Reported HPLC method [34]              |
|---------------------------------------------------------------------------------------------------------------------------------------------------------------------------------------|--------------------------------------------|--------------------------------------------|----------------------------------------|
| Principle 1. Direct Analytical Techniques Should Be Applied to Avoid Sample Treatment. (Sampling Procedure)                                                                           | Off-line Procedure                         | Off-line Procedure                         | Off-line Procedure                     |
| Principle 2. Minimal Sample Size and Minimal Number of Samples Are Goals. (Amount of sample in either gm or ml)                                                                       | 0.5 ml                                     | 0.5ml                                      | 0.5                                    |
| Principle 3. In Situ Measurements Should Be Performed. (Positioning of analytical device)                                                                                             | Off-line Procedure                         | Off-line Procedure                         | Off-line Procedure                     |
| Principle 4. Integration of Analytical Processes and Operations Saves Energy and Reduces the Use of Reagents. (sample steps preparation)                                              | 3                                          | 3                                          | Fewer than 3                           |
| Principle 5. Automated and Miniaturized Methods Should Be Selected. (Degree of automation and sample preparation)                                                                     | Semi-automated-<br>none or<br>miniaturized | Semi-automated-<br>none or<br>miniaturized | Semi-automated-none<br>or miniaturized |
| Principle 6. Derivatization Should Be Avoided. (Derivatization agents)                                                                                                                | None                                       | None                                       | None                                   |
| Principle 7. Generation of a Large Volume of Analytical Waste Should Be Avoided and Proper Management of Analytical Waste Should Be Provided. (amount of waste in gm or ml)           | 6.05 mL                                    | 13.7 mL                                    | 22 mL                                  |
| Principle 8. Multianalyte or Multiparameter Methods Are Preferred versus Methods Using One Analyte at a Time. (number of analytes analysed in single run / samples analysed per hour) | 3/20                                       | 3/5.45                                     | 3/5                                    |

|                                                                                                                           |                                                                                                                                 |                                                                                                |                                                                                                                                   |
|---------------------------------------------------------------------------------------------------------------------------|---------------------------------------------------------------------------------------------------------------------------------|------------------------------------------------------------------------------------------------|-----------------------------------------------------------------------------------------------------------------------------------|
| Principle 9. The Use of Energy Should Be Minimized.(most energy-intensive technique used in method)                       | 0.15                                                                                                                            | 0.44                                                                                           | 0.44                                                                                                                              |
| Principle 10. Reagents Obtained from Renewable Source Should Be Preferred. (Types of reagents)                            | Some reagents are bio-based                                                                                                     | Some reagents are bio-based                                                                    | all reagents are bio-based                                                                                                        |
| Principle 11. Toxic Reagents Should Be Eliminated or Replaced.( Involvement of toxic reagents - number of toxic reagents) | Yes – 3.65<br>(acetic acid - methanol)                                                                                          | Yes – 3.65<br>(acetic acid and ethanol)                                                        | Yes – 12.8<br>(methanol and acetonitrile)                                                                                         |
| Principle 12. The Safety of the Operator Should Be Increased. (Threats which are not avoided)                             | Toxic to aquatic life<br>(acetic acid)<br>Highly flammable<br>(methanol and methylene chloride)<br>Corrosive (acetic acid-NaOH) | Toxic to aquatic life<br>(acetic acid)<br>Highly flammable(ethanol)<br>Corrosive (acetic acid) | Toxic to aquatic life<br>(trifluoroacetic acid)<br>Highly flammable(methanol-acetonitrile)<br>Corrosive<br>(trifluoroacetic acid) |
| Clock like AGREE graph                                                                                                    |                                               |             |                                               |

Supplementary Table 7. Eco-scale metric system for the assessment of TLC-densitometric , RP-HPLC and the HPLC reported methods.

| TLC                                                                         |           |                                  |                                |                     |                                  |                                  |                    |                    |
|-----------------------------------------------------------------------------|-----------|----------------------------------|--------------------------------|---------------------|----------------------------------|----------------------------------|--------------------|--------------------|
| Parameters                                                                  | Reagents  |                                  |                                |                     | Instrument                       |                                  |                    |                    |
|                                                                             | Methanol  | Methylene chloride               | Acetic acid                    | EDTA                | Energy                           | Occupational hazards             | wastes             |                    |
|                                                                             |           |                                  |                                |                     |                                  |                                  | Waste generated    | Waste treatment    |
| Consumed volume/sample (ml)                                                 | 3.8mL     | 0.2mL                            | 0.6 (Extraction) +0.2 (System) | 0.9mL(extraction)   | <0.1 kWh per sample              | Analytical process hermetization | <10 mL             | No waste treatment |
| Subtotal PP solvent >1ml=1PP solvent 10-100=2PP Solvent > 100=3pp           | 1         | 1                                | 1                              | 1                   |                                  |                                  |                    |                    |
| Signal word(Danger = 2PP , Warning = 1PP)                                   | 2         | 1                                | 2                              | 2                   |                                  |                                  |                    |                    |
| No. of pictogram                                                            | 3         | 2                                | 2                              | 1                   |                                  |                                  |                    |                    |
| PP of solvent = subtotal PP x signal words PP x no.pictograms               | 6         | 2                                | 4                              | 2                   | 0 PP                             | 0 PP                             | 1 PP               | 3PP                |
| Penalty points summation                                                    | <b>14</b> |                                  |                                |                     | <b>4</b>                         |                                  |                    |                    |
| Total Penalty points                                                        | 18        |                                  |                                |                     |                                  |                                  |                    |                    |
| <b>Analytical Eco-scale score = 100-18 = 82</b>                             |           |                                  |                                |                     |                                  |                                  |                    |                    |
| RP-HPLC                                                                     |           |                                  |                                |                     |                                  |                                  |                    |                    |
| Parameters                                                                  | Reagents  |                                  |                                | Instrument          |                                  |                                  |                    |                    |
|                                                                             | Ethanol   | Acetic acid                      | EDTA                           | Energy              | Occupational hazard              | waste                            |                    |                    |
|                                                                             |           |                                  |                                |                     |                                  | Waste generated                  | Waste treatment    |                    |
| Consumed volume = run time x flow rate x solvent percentage in mobile phase | 5.3       | 0.6(extraction)+2.31(per sample) | 0.9                            | ≤1.5 kWh per sample | Analytical process hermetization | >10 mL                           | No waste treatment |                    |
| Subtotal PP (solvent < 10ml)                                                | 1         | 1                                | 1                              |                     |                                  |                                  |                    |                    |
| Signal word (Danger = 2PP , Warning = 1PP)                                  | 2         | 2                                | 2                              |                     |                                  |                                  |                    |                    |
| No. of pictogram                                                            | 2         | 2                                | 1                              |                     |                                  |                                  |                    |                    |
| PP of solvent = subtotal PP x signal words PP x no.pictograms               | 4         | 4                                | 2                              | 1PP                 | 0 PP                             | 5 PP                             | 3PP                |                    |
| Penalty points summation                                                    | <b>10</b> |                                  |                                | <b>9</b>            |                                  |                                  |                    |                    |
| Total Penalty points                                                        | 19        |                                  |                                |                     |                                  |                                  |                    |                    |
| <b>Analytical Eco-scale score = 100-23 = 81</b>                             |           |                                  |                                |                     |                                  |                                  |                    |                    |

| Reported HPLC [34]                                                          |           |                              |              |                     |                                  |                 |                    |
|-----------------------------------------------------------------------------|-----------|------------------------------|--------------|---------------------|----------------------------------|-----------------|--------------------|
| Parameters                                                                  | Reagents  |                              |              | Instrument          |                                  |                 |                    |
|                                                                             | methanol  | Trifluoroacetic acid<br>0.1% | Acetonitrile | Energy              | Occupational hazard              | waste           |                    |
|                                                                             |           |                              |              |                     |                                  | Waste generated | Waste treatment    |
| Consumed volume = run time x flow rate x solvent percentage in mobile phase | 10        | 0.01                         | 2.8          | ≤1.5 kWh per sample | Analytical process hermetization | >10 mL          | No waste treatment |
| Subtotal PP (solvent < 10ml)                                                | 1         | 1                            | 1            |                     |                                  |                 |                    |
| Signal word (Danger = 2PP, Warning = 1PP)                                   | 2         | 2                            | 2            |                     |                                  |                 |                    |
| No. of pictogram                                                            | 2         | 3                            | 2            |                     |                                  |                 |                    |
| PP of solvent = subtotal PP x signal words PP x no.pictograms               | 4         | 6                            | 4            | 1PP                 | 0 PP                             | 5               | 3                  |
| Penalty points summation                                                    | <b>14</b> |                              |              | <b>9</b>            |                                  |                 |                    |
| Total Penalty points                                                        | 23        |                              |              |                     |                                  |                 |                    |
| <b>Analytical Eco-scale score = 100-22 = 77</b>                             |           |                              |              |                     |                                  |                 |                    |
